# Supplementary material
Source: Springer Nature journal article supplement (https://www.springermedizin.de/resource/supplementary/12889_2006_1021_MOESM8_ESM.pdf/9503152)
Supplement: MOESM8 [file 9503152]

**Week 19**

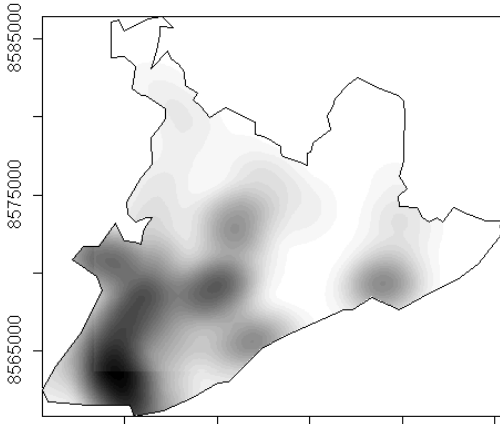

numbers of cases: 452

**Week 20**

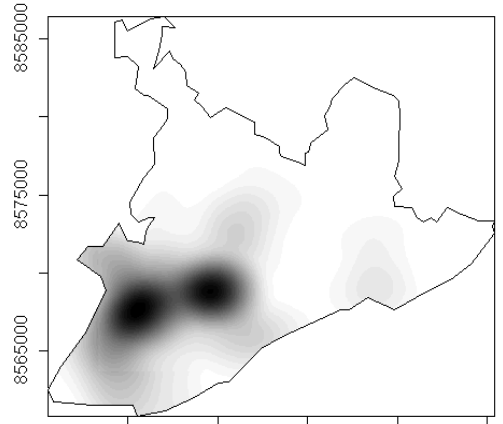

numbers of cases: 728

**Week 21**

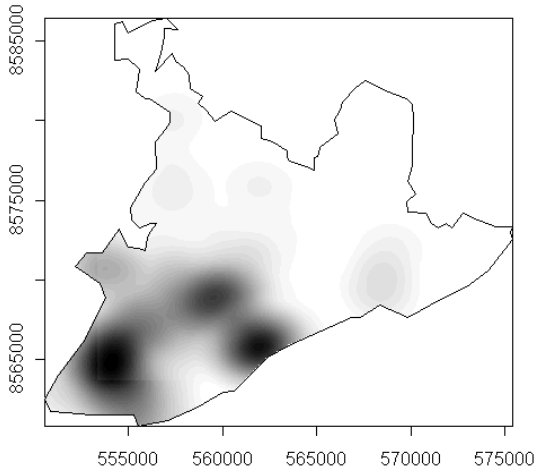

numbers of cases: 163

**Week 22**

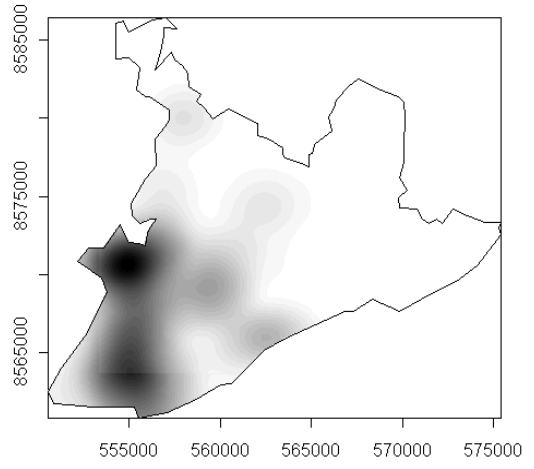

numbers of cases: 540

**Week 23**

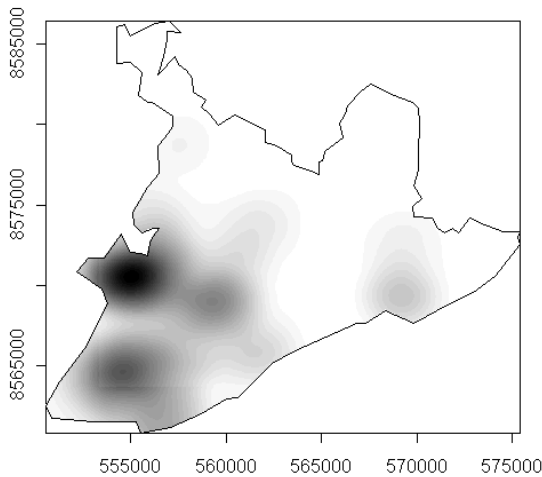

numbers of cases: 524

**Week 24**

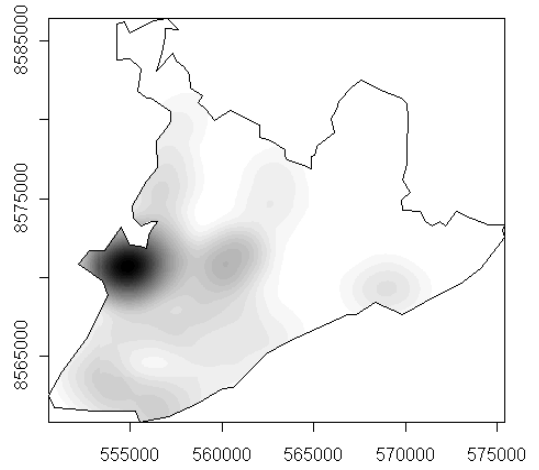

numbers of cases: 236
